# Supplementary material for: Prevalence, incidence and concomitant co-morbidities of type 2 diabetes mellitus in South Western Germany - a retrospective cohort and case control study in claims data of a large statutory health insurance
Source: Springer Nature journal article supplement (doi:10.1186/s12889-015-2188-1), 2015-09-02
Supplement: MOESM1 [file 9750212]

**Additional file 1: Burden of selected concomitant co-morbidities (2007-2010).**

The standardized prevalence ratios are shown for adiposity and several vascular determined concomitant diseases comparing insured persons with and without type 2 diabetes mellitus (T2DM). The prevalence rates were standardized for age and sex on the residual population of South Western Germany of the respective year with 95% confidence intervals (CI) (SPR = standardized prevalence ratio)

| Disease                | Year | Men                                    |                        |                        | Women                                  |                        |                        | Total                                  |                        |                        |
|------------------------|------|----------------------------------------|------------------------|------------------------|----------------------------------------|------------------------|------------------------|----------------------------------------|------------------------|------------------------|
|                        |      | Standardized prevalence rates (95% CI) |                        | SPR (95%CI)            | Standardized prevalence rates (95% CI) |                        | SPR (95%CI)            | Standardized prevalence rates (95% CI) |                        | SPR (95%CI)            |
|                        |      | Without T2DM.                          | With T2DM              |                        | Without T2DM.                          | With T2DM              |                        | Without T2DM.                          | With T2DM              |                        |
| Adiposity              | 2007 | 6.01<br>(5.99-6.03)                    | 28.67<br>(28.49-28.85) | 4.77<br>(1.98-11.5)    | 10.35<br>(10.32-10.38)                 | 37.19<br>(37.00-37.39) | 3.59<br>(1.8-7.16)     | 8.32<br>(8.31-8.34)                    | 33.26<br>(33.13-33.39) | 4<br>(1.87-8.54)       |
|                        | 2008 | 5.78<br>(5.75-5.80)                    | 26.40<br>(26.24-26.56) | 4.57<br>(1.86-11.25)   | 9.77<br>(9.74-9.79)                    | 34.47<br>(34.29-34.65) | 3.53<br>(1.73-7.18)    | 7.92<br>(7.91-7.94)                    | 30.78<br>(30.66-30.91) | 3.88<br>(1.78-8.48)    |
|                        | 2009 | 5.93<br>(5.90-5.95)                    | 26.80<br>(26.65-26.96) | 4.52<br>(1.86-11.01)   | 9.93<br>(9.90-9.95)                    | 34.61<br>(34.44-34.79) | 3.49<br>(1.72-7.06)    | 8.09<br>(8.07-8.11)                    | 31.07<br>(30.95-31.19) | 3.84<br>(1.77-8.32)    |
|                        | 2010 | 5.99<br>(5.97-6.01)                    | 27.11<br>(26.95-27.26) | 4.53<br>(1.87-10.96)   | 9.83<br>(9.81-9.86)                    | 34.49<br>(34.32-34.66) | 3.51<br>(1.73-7.12)    | 8.08<br>(8.07-8.10)                    | 31.13<br>(31.02-31.25) | 3.85<br>(1.78-8.35)    |
| Hypertension           | 2007 | 14.17<br>(14.14-14.21)                 | 69.52<br>(69.25-69.80) | 4.91<br>(2.77-8.68)    | 17.40<br>(17.37-17.44)                 | 75.39<br>(75.11-75.67) | 4.33<br>(2.57-7.3)     | 15.81<br>(15.79-15.84)                 | 72.60<br>(72.40-72.80) | 4.59<br>(2.66-7.91)    |
|                        | 2008 | 15.46<br>(15.43-15.50)                 | 71.28<br>(71.01-71.55) | 4.61<br>(2.66-7.99)    | 18.63<br>(18.60-18.67)                 | 76.41<br>(76.14-76.68) | 4.10<br>(2.47-6.8)     | 17.08<br>(17.06-17.11)                 | 73.98<br>(73.79-74.17) | 4.33<br>(2.56-7.33)    |
|                        | 2009 | 16.02<br>(15.99-16.06)                 | 80.01<br>(79.74-80.28) | 4.99<br>(2.92-8.54)    | 19.31<br>(19.27-19.35)                 | 79.83<br>(79.56-80.09) | 4.13<br>(2.52-6.80)    | 17.71<br>(17.68-17.74)                 | 79.89<br>(79.70-80.08) | 4.51<br>(2.70-7.55)    |
|                        | 2010 | 17.84<br>(17.80-17.87)                 | 74.68<br>(74.43-74.93) | 4.19<br>(2.50-7.02)    | 20.84<br>(20.80-20.88)                 | 79.12<br>(78.87-79.38) | 3.8<br>(2.34-6.15)     | 19.37<br>(19.34-19.40)                 | 77.01<br>(76.83-77.19) | 3.98<br>(2.42-6.54)    |
| Coronary heart disease | 2007 | 3.73<br>(3.71-3.74)                    | 24.40<br>(24.23-24.56) | 6.55<br>(2.20-19.48)   | 2.80<br>(2.79-2.82)                    | 17.19<br>(17.05-17.32) | 6.13<br>(1.73-21.65)   | 3.23<br>(3.22-3.24)                    | 20.57<br>(20.46-20.68) | 6.36<br>(1.97-20.55)   |
|                        | 2008 | 3.97<br>(3.96-3.99)                    | 25.21<br>(25.05-25.37) | 6.34<br>(2.20-18.27)   | 2.89<br>(2.88-2.91)                    | 17.26<br>(17.13-17.39) | 5.97<br>(1.72-20.72)   | 3.38<br>(3.37-3.39)                    | 20.94<br>(20.84-21.04) | 6.19<br>(1.96-19.53)   |
|                        | 2009 | 4.30<br>(4.28-4.32)                    | 26.45<br>(26.29-26.60) | 6.15<br>(2.22-17.04)   | 3.06<br>(3.04-3.07)                    | 17.86<br>(17.73-17.98) | 5.84<br>(1.74-19.65)   | 3.61<br>(3.60-3.62)                    | 21.80<br>(21.70-21.90) | 6.04<br>(1.98-18.4)    |
|                        | 2010 | 4.71<br>(4.69-4.73)                    | 27.77<br>(27.61-27.92) | 5.89<br>(2.22-15.65)   | 3.32<br>(3.31-3.34)                    | 18.95<br>(18.83-19.08) | 5.70<br>(1.78-18.29)   | 3.94<br>(3.92-3.95)                    | 22.99<br>(22.89-23.08) | 5.84<br>(2.01-17.02)   |
| Stroke                 | 2007 | 0.45<br>(0.44-0.46)                    | 3.83<br>(3.77-3.90)    | 8.50<br>(0.39-186.16)  | 0.40<br>(0.40-0.41)                    | 3.07<br>(3.01-3.13)    | 7.64<br>(0.29-204.84)  | 0.42<br>(0.42-0.43)                    | 3.43<br>(3.39-3.48)    | 8.09<br>(0.33-196.13)  |
|                        | 2008 | 0.53<br>(0.52-0.53)                    | 4.10<br>(4.04-4.16)    | 7.77<br>(0.44-136.58)  | 0.46<br>(0.45-0.46)                    | 3.16<br>(3.11-3.22)    | 6.93<br>(0.31-154.14)  | 0.49<br>(0.48-0.49)                    | 3.60<br>(3.56-3.64)    | 7.37<br>(0.37-146.57)  |
|                        | 2009 | 0.59<br>(0.59-0.60)                    | 4.31<br>(4.25-4.37)    | 7.24<br>(0.48-108.95)  | 0.52<br>(0.51-0.52)                    | 3.26<br>(3.20-3.31)    | 6.31<br>(0.33-118.87)  | 0.55<br>(0.54-0.55)                    | 3.74<br>(3.70-3.78)    | 6.80<br>(0.40-115.58)  |
|                        | 2010 | 0.70<br>(0.69-0.71)                    | 4.73<br>(4.67-4.80)    | 6.77<br>(0.55-83.35)   | 0.60<br>(0.59-0.61)                    | 3.66<br>(3.61-3.72)    | 6.10<br>(0.4-93.4)     | 0.64<br>(0.64-0.65)                    | 4.15<br>(4.11-4.19)    | 6.47<br>(0.47-89.7)    |
| Renal insufficiency    | 2007 | 0.74<br>(0.73-0.75)                    | 8.44<br>(8.34-8.53)    | 11.41<br>(1.06-122.87) | 0.52<br>(0.51-0.52)                    | 6.27<br>(6.18-6.35)    | 12.12<br>(0.71-206.48) | 0.62<br>(0.62-0.63)                    | 7.29<br>(7.23-7.36)    | 11.73<br>(0.88-156.11) |
|                        | 2008 | 0.89<br>(0.88-0.90)                    | 8.62<br>(8.52-8.71)    | 9.70<br>(1.09-86.13)   | 0.63<br>(0.62-0.63)                    | 6.38<br>(6.30-6.46)    | 10.18<br>(0.76-136.35) | 0.75<br>(0.74-0.75)                    | 7.42<br>(7.36-7.48)    | 9.94<br>(0.92-107.49)  |
|                        | 2009 | 1.09<br>(1.08-1.10)                    | 9.79<br>(9.70-9.89)    | 9.01<br>(1.24-65.38)   | 0.78<br>(0.77-0.79)                    | 7.58<br>(7.49-7.66)    | 9.70<br>(0.94-99.61)   | 0.92<br>(0.91-0.92)                    | 8.59<br>(8.53-8.65)    | 9.37<br>(1.09-80.81)   |
|                        | 2010 | 1.43<br>(1.42-1.44)                    | 8.65<br>(8.56-8.73)    | 6.06<br>(1.03-35.66)   | 1.08<br>(1.07-1.09)                    | 6.69<br>(6.62-6.76)    | 6.20<br>(0.81-47.33)   | 1.23<br>(1.22-1.24)                    | 7.57<br>(7.52-7.63)    | 6.17<br>(0.92-41.5)    |
| Retinopathy            | 2007 | 2.03<br>(2.01-2.04)                    | 23.22<br>(23.05-23.38) | 11.46<br>(2.73-48.17)  | 3.15<br>(3.14-3.17)                    | 25.96<br>(25.79-26.12) | 8.23<br>(2.56-26.51)   | 2.60<br>(2.59-2.61)                    | 24.65<br>(24.54-24.77) | 9.47<br>(2.64-33.95)   |
|                        | 2008 | 2.20<br>(2.19-2.21)                    | 23.57<br>(23.42-23.72) | 10.71<br>(2.69-42.66)  | 3.37<br>(3.35-3.39)                    | 26.08<br>(25.92-26.24) | 7.74<br>(2.49-24.06)   | 2.81<br>(2.80-2.82)                    | 24.89<br>(24.78-25.00) | 8.87<br>(2.58-30.48)   |
|                        | 2009 | 2.32<br>(2.31-2.33)                    | 23.46<br>(23.32-23.61) | 10.11<br>(2.62-38.95)  | 3.45<br>(3.44-3.47)                    | 25.69<br>(25.54-25.84) | 7.44<br>(2.42-22.87)   | 2.91<br>(2.90-2.92)                    | 24.63<br>(24.53-24.74) | 8.46<br>(2.51-28.52)   |
|                        | 2010 | 2.61<br>(2.60-2.62)                    | 23.71<br>(23.57-23.85) | 9.08<br>(2.53-32.61)   | 3.82<br>(3.80-3.84)                    | 25.86<br>(25.71-26.00) | 6.77<br>(2.31-19.82)   | 3.24<br>(3.23-3.25)                    | 24.83<br>(24.73-24.93) | 7.66<br>(2.41-24.37)   |
