# Supplementary material for: Prevalence, incidence and concomitant co-morbidities of type 2 diabetes mellitus in South Western Germany - a retrospective cohort and case control study in claims data of a large statutory health insurance
Source: Springer Nature journal article supplement (doi:10.1186/s12889-015-2188-1), 2015-09-02
Supplement: MOESM2 [file 9750212]

**Additional file 2: Semi-maximum prevalence and interpolated age shift of selected concomitant co-morbidities (2007-2010).**

The age and prevalence of concomitant co-morbidities at semi-maximum values are shown comparing insured persons with and without type 2 diabetes mellitus (T2DM) after standardization for age and sex on the residual population of South Western Germany of the respective year. R<sup>2</sup> is the goodness of fit from the respective regression model calculating the curves. For this analysis the age groups of 20 years and older were considered only. (\* The intersection with the fitted curve and the semi-maximum is located at a time point below 20 years. Therefore, the age shift is not calculable (NC).)

| Disease                | Year | Men                                                               |                       |                   | Women                                                             |                       |                   | Total                                                             |                       |                   |
|------------------------|------|-------------------------------------------------------------------|-----------------------|-------------------|-------------------------------------------------------------------|-----------------------|-------------------|-------------------------------------------------------------------|-----------------------|-------------------|
|                        |      | Age at semi-maximum (prevalence at semi-maximum, R <sup>2</sup> ) |                       | Age shift (years) | Age at semi-maximum (prevalence at semi-maximum, R <sup>2</sup> ) |                       | Age shift (years) | Age at semi-maximum (prevalence at semi-maximum, R <sup>2</sup> ) |                       | age shift (years) |
|                        |      | Without T2DM.                                                     | With T2DM             |                   | Without T2DM                                                      | With T2DM             |                   | Without T2DM                                                      | With T2DM             |                   |
| Adiposity              | 2007 | 40.3<br>(5.66, 0.91)                                              | 29.1<br>(17.41, 0.95) | 11                | 34.3<br>(8.77, 0.94)                                              | 24.0<br>(25.69, 0.98) | 10                | 36.5<br>(7.29, 0.93)                                              | 24.7<br>(21.07, 0.99) | 12                |
|                        | 2008 | 39.9<br>(5.27, 0.93)                                              | 27.1<br>(16.19, 0.94) | 13                | 33.3<br>(8.06, 0.95)                                              | 23.6<br>(24.35, 0.99) | 10                | 35.5<br>(6.65, 0.95)                                              | 24.2<br>(19.81, 0.97) | 11                |
|                        | 2009 | 38.7<br>(5.13, 0.94)                                              | 26.6<br>(16.30, 0.97) | 12                | 32.3<br>(8.05, 0.96)                                              | 22.3<br>(24.56, 0.99) | 10                | 34.7<br>(6.65, 0.95)                                              | 24.0<br>(20.55, 0.97) | 11                |
|                        | 2010 | 38.0<br>(5.07, 0.95)                                              | 24.7<br>(16.97, 0.99) | 13                | 31.8<br>(7.88, 0.96)                                              | <20*<br>(24.50, 1.00) | NC                | 34.3<br>(6.59, 0.96)                                              | 21.9<br>(20.56, 0.99) | 12                |
| Hypertension           | 2007 | 61.5<br>(31.78, 0.98)                                             | 42.5<br>(40.39, 0.97) | 19                | 62.3<br>(35.27, 0.97)                                             | 43.8<br>(42.82, 0.96) | 18                | 62.0<br>(33.95, 0.97)                                             | 43.4<br>(41.87, 0.97) | 19                |
|                        | 2008 | 60.9<br>(32.87, 0.98)                                             | 41.3<br>(40.90, 0.98) | 20                | 61.7<br>(36.15, 0.97)                                             | 42.8<br>(43.33, 0.96) | 19                | 61.4<br>(34.93, 0.97)                                             | 42.3<br>(42.40, 0.97) | 19                |
|                        | 2009 | 61.0<br>(33.35, 0.98)                                             | 38.6<br>(43.16, 0.89) | 22                | 61.9<br>(37.60, 0.97)                                             | 39.1<br>(42.86, 0.87) | 23                | 61.6<br>(36.04, 0.98)                                             | 38.8<br>(42.91, 0.88) | 23                |
|                        | 2010 | 56.5<br>(34.74, 0.97)                                             | 37.7<br>(42.39, 0.98) | 19                | 60.8<br>(37.58, 0.97)                                             | 40.9<br>(44.21, 0.97) | 20                | 60.5<br>(36.56, 0.97)                                             | 40.3<br>(43.54, 0.98) | 20                |
| Coronary heart disease | 2007 | 71.1<br>(15.77, 0.99)                                             | 63.9<br>(20.15, 0.99) | 7                 | 74.3<br>(11.92, 0.95)                                             | 70.8<br>(15.83, 0.99) | 3                 | 72.0<br>(12.89, 0.98)                                             | 65.0<br>(16.83, 0.99) | 7                 |
|                        | 2008 | 70.8<br>(16.14, 0.99)                                             | 62.7<br>(20.01, 0.98) | 8                 | 73.9<br>(11.97, 0.96)                                             | 70.3<br>(15.75, 1.00) | 4                 | 71.6<br>(12.99, 0.98)                                             | 64.1<br>(16.72, 0.99) | 8                 |
|                        | 2009 | 70.2<br>(16.35, 0.99)                                             | 61.9<br>(20.57, 0.98) | 8                 | 73.4<br>(12.05, 0.96)                                             | 69.7<br>(16.03, 1.00) | 4                 | 71.0<br>(13.09, 0.99)                                             | 63.2<br>(17.05, 0.99) | 8                 |
|                        | 2010 | 69.7<br>(16.74, 0.99)                                             | 61.5<br>(21.51, 0.98) | 8                 | 72.8<br>(12.38, 0.97)                                             | 68.9<br>(16.53, 1.00) | 4                 | 70.5<br>(13.42, 0.99)                                             | 62.5<br>(17.64, 0.98) | 8                 |
| Stroke                 | 2007 | 73.4<br>(2.56, 0.96)                                              | 70.0<br>(3.98, 0.99)  | 3                 | 76.0<br>(1.93, 0.91)                                              | 72.7<br>(3.14, 0.98)  | 3                 | 74.1<br>(2.09, 0.95)                                              | 70.4<br>(3.33, 1.00)  | 4                 |
|                        | 2008 | 72.5<br>(2.70, 0.96)                                              | 69.8<br>(4.23, 0.99)  | 3                 | 75.4<br>(2.06, 0.93)                                              | 71.7<br>(3.14, 0.99)  | 4                 | 73.4<br>(2.22, 0.96)                                              | 69.6<br>(3.39, 0.99)  | 4                 |
|                        | 2009 | 72.3<br>(2.92, 0.97)                                              | 67.6<br>(3.98, 0.98)  | 5                 | 74.6<br>(2.19, 0.94)                                              | 70.8<br>(3.15, 0.99)  | 4                 | 72.8<br>(2.37, 0.96)                                              | 68.2<br>(3.34, 0.99)  | 5                 |
|                        | 2010 | 71.1<br>(3.05, 0.97)                                              | 67.6<br>(4.45, 0.98)  | 5                 | 74.2<br>(2.45, 0.94)                                              | 70.2<br>(3.45, 0.99)  | 4                 | 72.2<br>(2.59, 0.97)                                              | 67.8<br>(3.66, 0.99)  | 4                 |
| Renal insufficiency    | 2007 | 75.9<br>(4.64, 0.92)                                              | 67.8<br>(8.18, 0.97)  | 8                 | 76.7<br>(2.47, 0.90)                                              | 63.1<br>(5.44, 0.89)  | 14                | 74.9<br>(3.01, 0.94)                                              | 63.1<br>(6.08, 0.97)  | 12                |
|                        | 2008 | 75.1<br>(5.18, 0.93)                                              | 67.7<br>(8.51, 0.98)  | 7                 | 76.2<br>(2.89, 0.91)                                              | 68.4<br>(5.67, 0.97)  | 8                 | 74.3<br>(3.46, 0.94)                                              | 65.9<br>(6.32, 0.98)  | 8                 |
|                        | 2009 | 74.5<br>(5.91, 0.95)                                              | 67.0<br>(9.48, 0.98)  | 8                 | 75.4<br>(3.46, 0.92)                                              | 67.3<br>(6.59, 0.97)  | 8                 | 73.8<br>(4.06, 0.95)                                              | 65.2<br>(7.24, 0.98)  | 9                 |
|                        | 2010 | 73.0<br>(6.97, 0.96)                                              | 66.1<br>(8.13, 0.97)  | 7                 | 74.4<br>(4.54, 0.93)                                              | 66.0<br>(5.64, 0.98)  | 8                 | 72.7<br>(5.12, 0.96)                                              | 64.0<br>(6.19, 0.99)  | 9                 |
| Retinopathy            | 2007 | 72.4<br>(9.08, 0.96)                                              | 47.3<br>(15.15, 0.96) | 25                | 69.9<br>(9.44, 0.96)                                              | 48.2<br>(16.41, 0.93) | 22                | 71.0<br>(9.35, 0.97)                                              | 48.1<br>(15.92, 0.95) | 23                |
|                        | 2008 | 72.2<br>(9.57, 0.97)                                              | 42.9<br>(15.06, 0.92) | 29                | 69.6<br>(9.78, 0.96)                                              | 48.3<br>(16.43, 0.94) | 21                | 70.6<br>(9.69, 0.97)                                              | 46.7<br>(15.91, 0.94) | 24                |
|                        | 2009 | 71.4<br>(9.49, 0.97)                                              | 46.7<br>(15.08, 0.96) | 25                | 69.5<br>(9.89, 0.96)                                              | 48.7<br>(16.22, 0.94) | 21                | 70.0(9.62, 0.97)                                                  | 48.2<br>(15.79, 0.95) | 22                |
|                        | 2010 | 70.3<br>(9.53, 0.98)                                              | 45.7<br>(15.60, 0.95) | 25                | 69.0<br>(10.32, 0.96)                                             | 48.9<br>(16.39, 0.92) | 20                | 69.1(9.79, 0.97)                                                  | 47.9<br>(16.07, 0.94) | 21                |
