# Supplementary material for: Prevalence, incidence and concomitant co-morbidities of type 2 diabetes mellitus in South Western Germany - a retrospective cohort and case control study in claims data of a large statutory health insurance
Source: Springer Nature journal article supplement (doi:10.1186/s12889-015-2188-1), 2015-09-02
Supplement: MOESM3 [file 9750212]

**Additional file 3: Excess risk of disease for selected concomitant co-morbidities (2007-2010).**

The prevalences of concomitant co-morbidities are shown comparing all persons with type 2 diabetes mellitus (T2DM) and respective controls in a case-control-study. The controls are matched individually by age and sex. The prevalence rates as well as the respective odds ratios are calculated with 95% confidence intervals (CI). This analysis was performed without standardization.

| Disease                | Year | Men                       |                        |                     | Women                     |                        |                     | Total                     |                        |                     |
|------------------------|------|---------------------------|------------------------|---------------------|---------------------------|------------------------|---------------------|---------------------------|------------------------|---------------------|
|                        |      | Prevalence rates (95% CI) |                        | Odds Ratio (95% CI) | Prevalence rates (95% CI) |                        | Odds Ratio (95% CI) | Prevalence rates (95% CI) |                        | Odds Ratio (95% CI) |
|                        |      | With T2DM                 | Controls               |                     | With T2DM                 | Controls               |                     | With T2DM                 | Controls               |                     |
| Adiposity              | 2007 | 26.98<br>(26.71-27.26)    | 11.09<br>(10.92-11.27) | 2.96<br>(2.90-3.02) | 33.18<br>(32.91-33.45)    | 14.97<br>(14.79-15.15) | 2.82<br>(2.78-2.87) | 30.48<br>(30.28-30.67)    | 13.28<br>(13.15-13.40) | 2.86<br>(2.83-2.90) |
|                        | 2008 | 24.94<br>(24.68-25.20)    | 10.26<br>(10.10-10.43) | 2.90<br>(2.84-2.97) | 31.09<br>(30.83-31.35)    | 13.80<br>(13.63-13.97) | 2.82<br>(2.77-2.87) | 28.40<br>(28.21-28.58)    | 12.25<br>(12.13-12.37) | 2.84<br>(2.80-2.88) |
|                        | 2009 | 25.47<br>(25.20-25.73)    | 10.28<br>(10.12-10.45) | 2.98<br>(2.92-3.04) | 31.58<br>(31.32-31.83)    | 13.73<br>(13.56-13.90) | 2.90<br>(2.85-2.95) | 28.89<br>(28.71-29.07)    | 12.21<br>(12.09-12.33) | 2.92<br>(2.88-2.96) |
|                        | 2010 | 25.98<br>(25.72-26.24)    | 10.24<br>(10.07-10.40) | 3.08<br>(3.02-3.14) | 31.99<br>(31.73-32.24)    | 13.64<br>(13.48-13.81) | 2.98<br>(2.93-3.03) | 29.31<br>(29.13-29.50)    | 12.13<br>(12.01-12.24) | 3.00<br>(2.97-3.04) |
| Hypertension           | 2007 | 73.14<br>(72.69-73.59)    | 53.46<br>(53.07-53.84) | 2.37<br>(2.33-2.41) | 79.02<br>(78.6-79.43)     | 61.38<br>(61.01-61.74) | 2.37<br>(2.33-2.41) | 76.45<br>(76.15-76.76)    | 57.92<br>(57.66-58.19) | 2.36<br>(2.33-2.38) |
|                        | 2008 | 74.60<br>(74.15-75.05)    | 54.82<br>(54.44-55.21) | 2.42<br>(2.38-2.46) | 79.88<br>(79.47-80.29)    | 62.24<br>(61.88-62.61) | 2.41<br>(2.37-2.44) | 77.57<br>(77.26-77.87)    | 59.00<br>(58.73-59.26) | 2.40<br>(2.38-2.43) |
|                        | 2009 | 85.29<br>(84.81-85.76)    | 56.14<br>(55.75-56.53) | 4.53<br>(4.45-4.61) | 84.10<br>(83.68-84.52)    | 62.81<br>(62.45-63.17) | 3.13<br>(3.08-3.18) | 84.62<br>(84.31-84.94)    | 59.88<br>(59.61-60.14) | 3.69<br>(3.64-3.73) |
|                        | 2010 | 77.40<br>(76.95-77.84)    | 57.08<br>(56.69-57.46) | 2.58<br>(2.53-2.62) | 81.93<br>(81.52-82.34)    | 63.14<br>(62.78-63.50) | 2.65<br>(2.61-2.69) | 79.91<br>(79.61-80.22)    | 60.44<br>(60.18-60.71) | 2.60<br>(2.58-2.63) |
| Coronary heart disease | 2007 | 27.93<br>(27.65-28.21)    | 17.36<br>(17.14-17.58) | 1.84<br>(1.81-1.88) | 20.67<br>(20.46-20.88)    | 12.57<br>(12.40-12.73) | 1.81<br>(1.78-1.85) | 23.84<br>(23.67-24.01)    | 14.66<br>(14.53-14.79) | 1.82<br>(1.80-1.85) |
|                        | 2008 | 28.49<br>(28.21-28.77)    | 17.67<br>(17.45-17.89) | 1.86<br>(1.82-1.89) | 20.38<br>(20.17-20.59)    | 12.41<br>(12.25-12.57) | 1.81<br>(1.77-1.84) | 23.93<br>(23.76-24.10)    | 14.71<br>(14.58-14.84) | 1.82<br>(1.80-1.85) |
|                        | 2009 | 29.54<br>(29.26-29.82)    | 18.02<br>(17.80-18.24) | 1.91<br>(1.87-1.94) | 20.65<br>(20.44-20.86)    | 12.22<br>(12.06-12.38) | 1.87<br>(1.84-1.90) | 24.56<br>(24.39-24.73)    | 14.77<br>(14.64-14.90) | 1.88<br>(1.86-1.90) |
|                        | 2010 | 30.52<br>(30.24-30.80)    | 18.6<br>(18.38-18.81)  | 1.92<br>(1.89-1.96) | 21.35<br>(21.14-21.56)    | 12.55<br>(12.39-12.71) | 1.89<br>(1.86-1.92) | 25.43<br>(25.26-25.60)    | 15.24<br>(15.11-15.37) | 1.90<br>(1.87-1.92) |
| Stroke                 | 2007 | 4.62<br>(4.51-4.74)       | 2.64<br>(2.56-2.73)    | 1.79<br>(1.71-1.86) | 3.76<br>(3.67-3.85)       | 2.15<br>(2.08-2.22)    | 1.78<br>(1.71-1.85) | 4.14<br>(4.07-4.21)       | 2.36<br>(2.31-2.42)    | 1.78<br>(1.73-1.83) |
|                        | 2008 | 4.85<br>(4.74-4.97)       | 2.77<br>(2.69-2.86)    | 1.79<br>(1.72-1.86) | 3.78<br>(3.69-3.87)       | 2.26<br>(2.19-2.33)    | 1.70<br>(1.64-1.77) | 4.25<br>(4.18-4.32)       | 2.48<br>(2.43-2.54)    | 1.74<br>(1.69-1.79) |
|                        | 2009 | 4.97<br>(4.85-5.08)       | 2.97<br>(2.89-3.06)    | 1.71<br>(1.64-1.77) | 3.81<br>(3.73-3.90)       | 2.40<br>(2.33-2.47)    | 1.61<br>(1.55-1.68) | 4.32<br>(4.25-4.39)       | 2.65<br>(2.60-2.71)    | 1.66<br>(1.61-1.70) |
|                        | 2010 | 5.37<br>(5.25-5.49)       | 3.23<br>(3.14-3.32)    | 1.70<br>(1.64-1.76) | 4.16<br>(4.07-4.25)       | 2.54<br>(2.47-2.61)    | 1.67<br>(1.61-1.73) | 4.70<br>(4.63-4.77)       | 2.85<br>(2.79-2.90)    | 1.68<br>(1.64-1.73) |
| Renal insufficiency    | 2007 | 9.76<br>(9.59-9.92)       | 3.61<br>(3.51-3.71)    | 2.89<br>(2.79-2.99) | 7.26<br>(7.14-7.39)       | 2.41<br>(2.34-2.48)    | 3.17<br>(3.06-3.29) | 8.35<br>(8.25-8.45)       | 2.93<br>(2.87-2.99)    | 3.02<br>(2.95-3.09) |
|                        | 2008 | 9.94<br>(9.77-10.1)       | 4.02<br>(3.92-4.12)    | 2.63<br>(2.55-2.72) | 7.37<br>(7.25-7.50)       | 2.64<br>(2.56-2.71)    | 2.94<br>(2.84-3.04) | 8.50<br>(8.40-8.60)       | 3.24<br>(3.18-3.30)    | 2.77<br>(2.71-2.84) |
|                        | 2009 | 11.08<br>(10.91-11.26)    | 4.22<br>(4.12,4.33)    | 2.83<br>(2.74-2.92) | 8.56<br>(8.43-8.70)       | 2.95<br>(2.87-3.03)    | 3.08<br>(2.99-3.18) | 9.67<br>(9.56-9.78)       | 3.51<br>(3.44-3.57)    | 2.94<br>(2.88-3.01) |
|                        | 2010 | 9.56<br>(9.40-9.72)       | 3.15<br>(3.06-3.24)    | 3.25<br>(3.14-3.36) | 7.38<br>(7.25-7.5)        | 2.18<br>(2.11-2.25)    | 3.57<br>(3.45-3.70) | 8.35<br>(8.25-8.45)       | 2.61<br>(2.56-2.67)    | 3.39<br>(3.31-3.48) |
| Retinopathy            | 2007 | 25.16<br>(24.90-25.43)    | 8.88<br>(8.72-9.03)    | 3.45<br>(3.38-3.53) | 27.66<br>(27.42-27.91)    | 13.03<br>(12.86-13.20) | 2.55<br>(2.51-2.60) | 26.57<br>(26.39-26.75)    | 11.22<br>(11.1-11.33)  | 2.86<br>(2.83-2.90) |
|                        | 2008 | 25.38<br>(25.12-25.64)    | 9.01<br>(8.85-9.17)    | 3.43<br>(3.36-3.51) | 27.72<br>(27.47-27.96)    | 13.21<br>(13.05-13.38) | 2.52<br>(2.48-2.56) | 26.69<br>(26.51-26.87)    | 11.37<br>(11.26-11.49) | 2.84<br>(2.80-2.88) |
|                        | 2009 | 25.23<br>(24.97-25.49)    | 8.97<br>(8.82-9.13)    | 3.42<br>(3.35-3.50) | 27.28<br>(27.04-27.52)    | 12.84<br>(12.68-13.01) | 2.55<br>(2.50-2.59) | 26.38<br>(26.20-26.56)    | 11.14<br>(11.03-11.25) | 2.86<br>(2.82-2.90) |
|                        | 2010 | 25.27<br>(25.02-25.53)    | 9.14<br>(8.99-9.29)    | 3.36<br>(3.29-3.43) | 27.38<br>(27.14-27.61)    | 13.17<br>(13.01-13.34) | 2.48<br>(2.44-2.53) | 26.44<br>(26.27-26.61)    | 11.38<br>(11.27-11.49) | 2.80<br>(2.76-2.84) |
